# Supplementary material for: Cyclic cooperativity contributions determine the hydrogen bond strengths in molecular clusters
Source: Royal Society of Chemistry journal article supplement (doi:10.1039/d4cp04741a), 2025-01-01
Supplement: d4cp04741a1.pdf [file d4cp04741a1.pdf]

## **Electronic Supplementary Information**

### **Cyclic Cooperativity Contributions Determine the Hydrogen Bond Strengths in Molecular Clusters**

Ayush Shivhare,<sup>1</sup> Bharti Dehariya,<sup>1</sup> Shridhar R. Gadre<sup>2,3</sup> Milind M Deshmukh\*<sup>1</sup>

<sup>1</sup>Department of Chemistry, Dr. Harisingh Gour Vishwavidyalaya (A Central University),  
Sagar-470003, India

<sup>2</sup>Department of Scientific Computing, Modelling and Simulation, Savitribai Phule Pune  
University, Pune-411007, India

<sup>3</sup>Department of Chemistry, Savitribai Phule Pune University, Pune-411007, India

---

Corresponding Authors' E-mail addresses: [milind.deshmukh@gmail.com](mailto:milind.deshmukh@gmail.com)

**Table S1** Molecular energies (in a.u.) of various species of **HB1** energy evaluation in cyclic ammonia tetramer **e** by the MTA-based method (*cf.* Scheme 1 in Main text) calculated at the MP2/aug-cc-pVTZ level. See main text for details.

| Species                                    | Energy       |
|--------------------------------------------|--------------|
| Ammonia Tetramer ( $E_M$ )                 | -225.9369404 |
| Fragment F1 ( $E_{F1}$ )                   | -169.4452682 |
| Fragment F2 ( $E_{F2}$ )                   | -169.4444387 |
| Fragment F3 ( $E_{F3}$ )                   | -112.9599266 |
| Ammonia dimer ( $E_{N2\dots N1}^{dimer}$ ) | -112.9599268 |
| Ammonia monomer ( $E_{N1}^{monomer}$ )     | -56.4772137  |
| Ammonia monomer ( $E_{N2}^{monomer}$ )     | -56.4773467  |

**Table S2** Molecular energies (in a.u.) of various species of **HB1** energy evaluation in cyclic ammonia tetramer **a** by the MTA-based method (*cf.* Scheme S1) calculated at the MP2(full)/aug-cc-pVTZ level.

| Species                             | Energy       |
|-------------------------------------|--------------|
| Ammonia Tetramer <b>a</b> ( $E_a$ ) | -225.9278084 |
| Fragment F1 ( $E_{F1}$ )            | -169.4415391 |
| Fragment F2 ( $E_{F2}$ )            | -169.4412429 |
| Fragment F3 ( $E_{F3}$ )            | -112.9599266 |

**Table S3** Molecular energies (in a.u.) of various species of **HB1** energy evaluation in Parent  $(\text{NH}_3)_8$  cluster by the MTA-based method (*cf.* Scheme S2) calculated at the MP2(full)/aug-cc-pVTZ level.

| Species                  | Energy       |
|--------------------------|--------------|
| Parent Cluster           | -451.8966258 |
| Fragment F1 ( $E_{F1}$ ) | -395.3993951 |
| Fragment F2 ( $E_{F2}$ ) | -395.3982156 |
| Fragment F3 ( $E_{F3}$ ) | -338.9073695 |

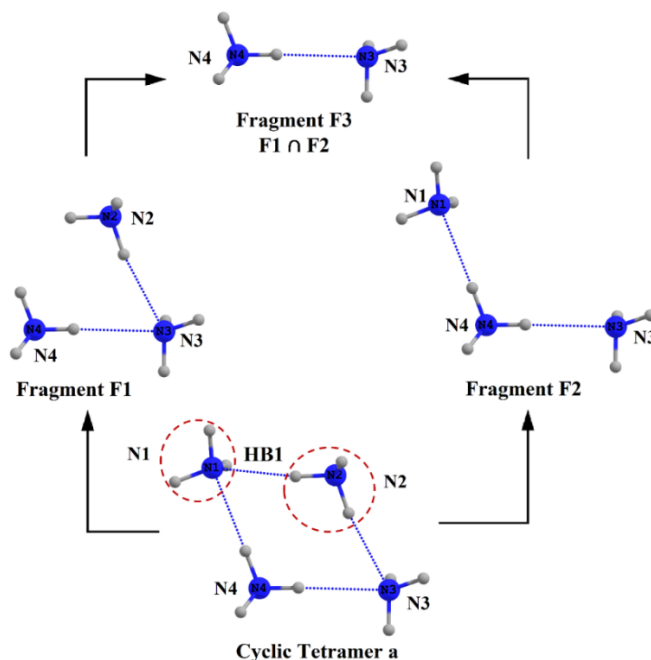

**Scheme S1** MTA based fragmentation scheme for the estimation of strength of HB1 in cyclic tetramer **a** present in  $(\text{NH}_3)_8$ .

Scheme S1 presents the MTA-based fragmentation method for the estimation of strength of **HB1** in ammonia tetramer **a** consisting of ammonia molecules N1, N2, N3 and N4. The **HB1** represent the interaction of ammonia molecules N1 and N2. Similar to the fragmentation procedure for tetramer **e** (in main text), the cyclic tetramer **a** is divided into two primary fragments Fragment F1 and Fragment F2, by removing ammonia molecule N1 and N2, respectively. Fragment F3 (consisting of ammonia molecule N3 and N4) is the common overlap fragment of Fragment F1 and F2. Using the single point (SP) energies of these fragments the  $E_{\text{HB1}}$  in this tetrameric ammonia cycle **a** can be calculated as  $E_{\text{HB1}}^{\text{cyc } a} = (E_{\text{F1}} + E_{\text{F2}} - E_{\text{F3}}) - E_a = 3.11$  kcal/mol at the MP2(full)/aug-cc-pVTZ level. For energies of  $E_{\text{F1}}$ ,  $E_{\text{F2}}$ ,  $E_{\text{F3}}$  and  $E_a$ ; see Table S2 in this electronic supplementary information (ESI). However, the calculated  $E_{\text{HB1}}^{\text{cyc } a}$  for this cyclic tetramer **a** includes the cooperativity contribution of ammonia molecule N3 and N4. Recall the discussion in the main text that the interaction energy of **HB1** in an isolated N1...N2 dimer ( $E_{\text{HB1}}^{\text{dimer}} = 3.36$  kcal/mol) excludes this cooperativity effect. Therefore, the cooperativity contribution (the difference between  $E_{\text{HB1}}^{\text{cyc } a}$  and  $E_{\text{HB1}}^{\text{dimer}}$ ) to the

**HB1** in cyclic tetramer **a** is  $E_{coop.}^{cyc a} = E_{HB1}^{cyc a} - E_{HB1}^{dimer} = 3.11 - 3.36 = -0.25$  kcal/mol. The negative value of  $E_{coop.}^{cyc a}$  affirms the anti-cooperativity experienced by **HB1** in this cyclic tetramer **a**.

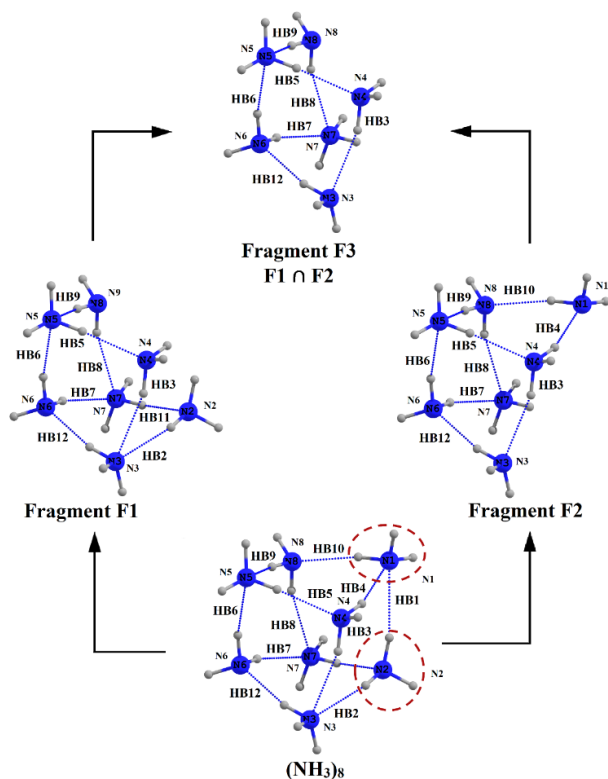

**Scheme S2** MTA based fragmentation scheme for the estimation of strength of **HB1** in Parent  $(\text{NH}_3)_8$  Cluster.

In similar manner, the energy of **HB1** in actual  $(\text{NH}_3)_8$  cluster can be calculated (*cf.* Scheme S2) by the MTA-based method by dividing the  $(\text{NH}_3)_8$  cluster into two primary fragments, F1 and F2 (obtained by removing ammonia molecules N1 and N2, respectively). A common overlapping fragment of F1 and F2 is fragment F3 consisting of six ammonia molecules (N3, N4, N5, N6, N7 and N8). The energy of **HB** in any molecular cluster can be obtained using the SP energy of these fragments and that of the parent cluster as  $E_{HB}^{cluster} = (E_{F1} + E_{F2} - E_{F3}) - E_{cluster} \dots$  (S1). For the energy of **HB1** in this  $(\text{NH}_3)_8$  cluster, this eq. S1 can be written as  $E_{HB1}^{(\text{NH}_3)_8} = (E_{F1} + E_{F2} - E_{F3}) - E_{(\text{NH}_3)_8} = 4.00$  kcal/mol at the MP2(full)/aug-cc-pVTZ level. For details of energy of these primary fragments and that of parent  $(\text{NH}_3)_8$  cluster, see Table S3 in ESI.

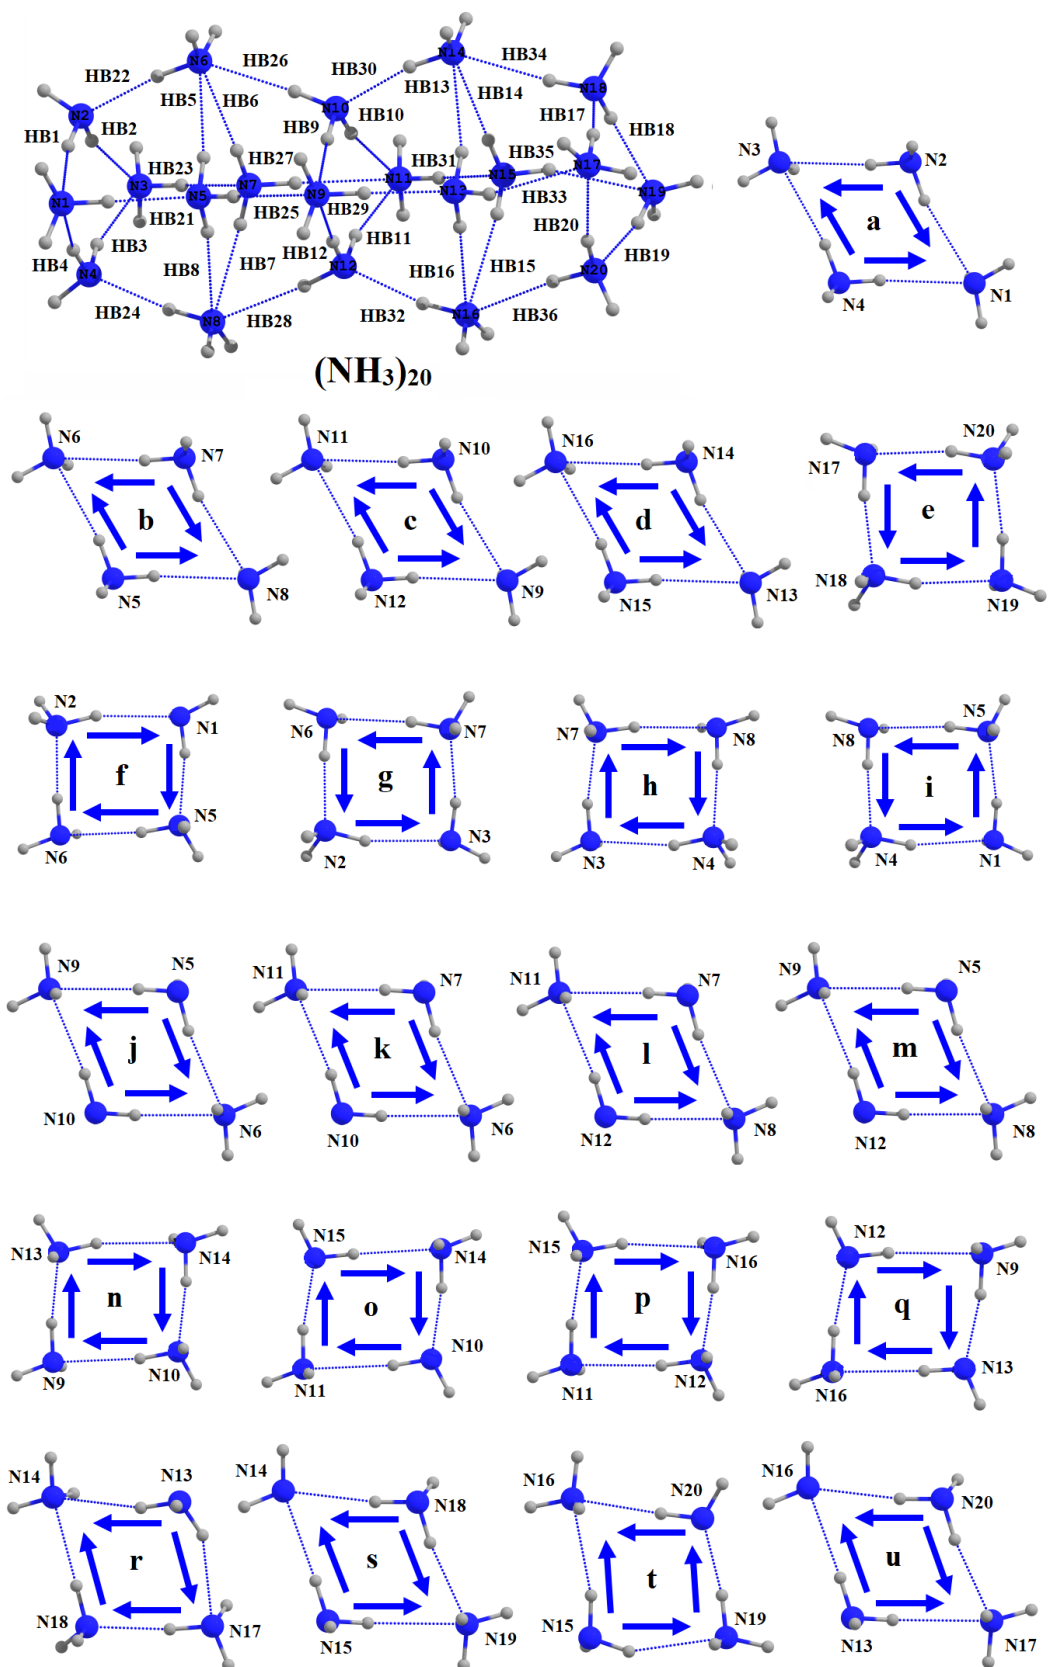

**Fig. S1** Structure of  $(\text{NH}_3)_{20}$  cluster consisting of twenty-one tetrameric cycles denoted by labels **a** to **u**.

**Table S4** The hydrogen bond energies (in kcal/mol) in  $(\text{NH}_3)_{20}$  cluster obtained by synergetic addition of cyclic cooperativity contributions ( $E_{\text{HB}}^{\text{Synergetic}}$ ) and that by MTA-based method employing actual cluster ( $E_{\text{HB}}^{(\text{NH}_3)_{20}}$ ). The hydrogen bond energy in the respective dimer species ( $E_{\text{HB}}^{\text{Dimer}}$ ) is also provided (kcal/mol). All the calculations were performed at MP2/aug-cc-pVTZ level of theory. See Fig. S1 and main text for details.

| HB   | $E_{\text{HB}}^{\text{Dimer}}$ | $E_{\text{coop.}}^{\text{Cycle1}}$ | $E_{\text{coop.}}^{\text{Cycle2}}$ | $E_{\text{coop.}}^{\text{Cycle3}}$ | $E_{\text{HB}}^{\text{Synergetic}}$ | $E_{\text{HB}}^{(\text{NH}_3)_{20}}$ | $ \Delta E_{\text{HB}} $ |
|------|--------------------------------|------------------------------------|------------------------------------|------------------------------------|-------------------------------------|--------------------------------------|--------------------------|
| HB1  | 3.04                           | -0.22 (-a)                         | 1.26 (+f)                          | -                                  | 4.07                                | 3.88                                 | 0.19                     |
| HB2  | 3.04                           | -0.22 (-a)                         | 1.26 (+g)                          | -                                  | 4.08                                | 3.89                                 | 0.19                     |
| HB3  | 3.04                           | -0.22 (-a)                         | 1.26 (+h)                          | -                                  | 4.07                                | 3.88                                 | 0.19                     |
| HB4  | 3.04                           | -0.22 (-a)                         | 1.26 (+i)                          | -                                  | 4.08                                | 3.89                                 | 0.19                     |
| HB5  | 2.81                           | -0.14(-b)                          | -0.14(-j)                          | 1.02 (+f)                          | 3.55                                | 3.39                                 | 0.16                     |
| HB6  | 2.81                           | -0.14(-b)                          | -0.13(-k)                          | 1.03 (+g)                          | 3.58                                | 3.40                                 | 0.18                     |
| HB7  | 2.81                           | -0.14(-b)                          | -0.14(-l)                          | 1.02 (+h)                          | 3.55                                | 3.39                                 | 0.16                     |
| HB8  | 2.81                           | -0.13(-b)                          | -0.13(-m)                          | 1.03 (+i)                          | 3.58                                | 3.40                                 | 0.18                     |
| HB9  | 2.91                           | -0.14(-c)                          | -0.15(-j)                          | 1.03 (+n)                          | 3.64                                | 3.54                                 | 0.10                     |
| HB10 | 2.84                           | -0.15(-c)                          | 1.06 (+o)                          | -0.15(-k)                          | 3.60                                | 3.46                                 | 0.14                     |
| HB11 | 2.91                           | -0.14(-c)                          | 1.03(+p)                           | -0.15 (-l)                         | 3.64                                | 3.54                                 | 0.10                     |
| HB12 | 2.84                           | -0.15(-c)                          | 1.06(+q)                           | -0.15 (-m)                         | 3.60                                | 3.46                                 | 0.14                     |
| HB13 | 2.84                           | -0.13(-d)                          | -0.34(-r)                          | 0.98 (+n)                          | 3.35                                | 3.40                                 | 0.05                     |
| HB14 | 2.81                           | -0.13(-d)                          | -0.11(-s)                          | 1.11 (+o)                          | 3.67                                | 3.46                                 | 0.21                     |
| HB15 | 2.84                           | -0.13(-d)                          | -0.34(-t)                          | 0.98 (+p)                          | 3.35                                | 3.40                                 | 0.05                     |
| HB16 | 2.81                           | -0.13(-d)                          | -0.11(-u)                          | 1.11 (+q)                          | 3.67                                | 3.46                                 | 0.21                     |
| HB17 | 2.73                           | 1.41 (+e)                          | 0.73 (+r)partial                   | -                                  | 4.87                                | 4.81                                 | 0.06                     |
| HB18 | 3.04                           | 1.42 (+e)                          | -0.30 (-s)                         | -                                  | 4.16                                | 3.94                                 | 0.22                     |
| HB19 | 2.73                           | 1.41 (+e)                          | 0.73 (+t)partial                   | -                                  | 4.87                                | 4.81                                 | 0.06                     |
| HB20 | 3.04                           | 1.42 (+e)                          | -0.30 (-u)                         | -                                  | 4.16                                | 3.94                                 | 0.22                     |
| HB21 | 2.72                           | 1.19 (+f)                          | 1.19 (+i)                          | -                                  | 5.10                                | 4.98                                 | 0.12                     |
| HB22 | 2.57                           | 1.10 (+f)                          | 1.10 (+g)                          | -                                  | 4.77                                | 4.88                                 | 0.11                     |
| HB23 | 2.72                           | 1.19 (+g)                          | 1.19 (+h)                          | -                                  | 5.10                                | 4.98                                 | 0.12                     |
| HB24 | 2.57                           | 1.10 (+i)                          | 1.10(+h)                           | -                                  | 4.77                                | 4.88                                 | 0.11                     |
| HB25 | 2.50                           | -0.13 (-j)                         | -0.13 (-m)                         | -                                  | 2.24                                | 3.07                                 | 0.83                     |
| HB26 | 2.54                           | -0.16 (-j)                         | -0.15 (-k)                         | -                                  | 2.23                                | 3.19                                 | 0.96                     |
| HB27 | 2.50                           | -0.13 (-l)                         | -0.13 (-k)                         | -                                  | 2.24                                | 3.07                                 | 0.83                     |
| HB28 | 2.54                           | -0.16 (-l)                         | -0.15 (-m)                         | -                                  | 2.23                                | 3.19                                 | 0.96                     |
| HB29 | 2.62                           | 0.98 (+n)                          | 1.08 (+q)                          | -                                  | 4.68                                | 5.00                                 | 0.32                     |
| HB30 | 2.45                           | 1.03 (+n)                          | 1.08 (+o)                          | -                                  | 4.56                                | 5.08                                 | 0.52                     |
| HB31 | 2.62                           | 0.98 (+p)                          | 1.08 (+o)                          | -                                  | 4.68                                | 5.00                                 | 0.32                     |
| HB32 | 2.45                           | 1.03 (+p)                          | 1.08 (+q)                          | -                                  | 4.56                                | 5.08                                 | 0.52                     |
| HB33 | 1.88                           | 0.12 (-r)                          | -0.10 (-u)                         | -                                  | 1.90                                | 2.13                                 | 0.23                     |
| HB34 | 2.54                           | 0.27 (-r)                          | -0.32 (-s)                         | -                                  | 2.49                                | 2.95                                 | 0.46                     |
| HB35 | 1.88                           | 0.12 (-t)                          | -0.10 (-s)                         | -                                  | 1.90                                | 2.13                                 | 0.23                     |
| HB36 | 2.54                           | 0.27 (-t)                          | -0.32 (-u)                         | -                                  | 2.49                                | 2.95                                 | 0.46                     |

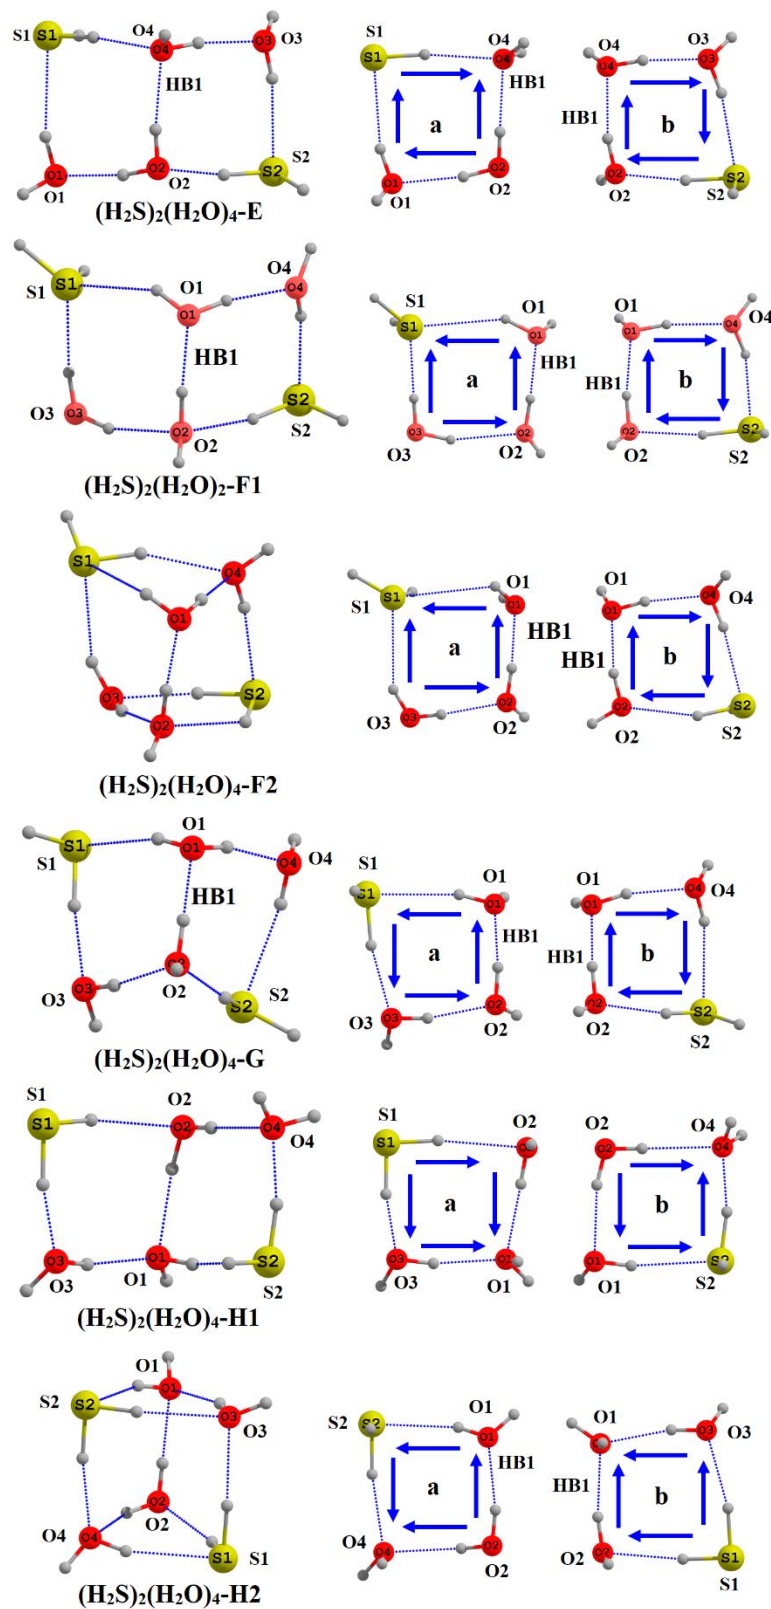

**Fig. S2** Structure of  $(\text{H}_2\text{S})_2(\text{H}_2\text{O})_4$  clusters in various possible combinations of two tetrameric cooperative cycles common to O-H...O HBs leading different conformations E to H of  $(\text{H}_2\text{S})_2(\text{H}_2\text{O})_4$  cluster.

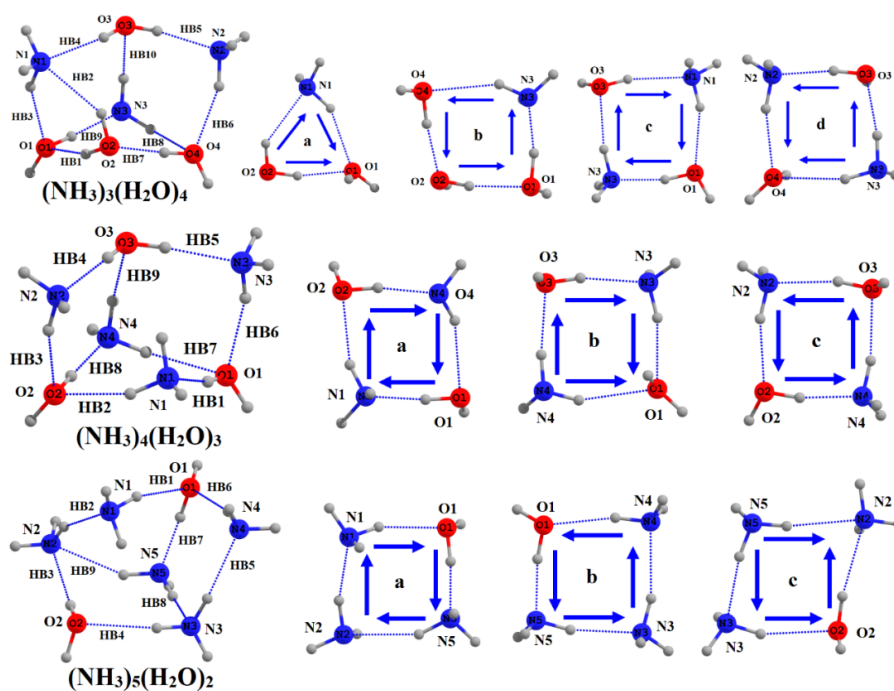

**Fig. S3** Structure of  $(\text{NH}_3)_3(\text{H}_2\text{O})_4$ ,  $(\text{NH}_3)_4(\text{H}_2\text{O})_3$  and  $(\text{NH}_3)_5(\text{H}_2\text{O})_2$  clusters. The  $(\text{NH}_3)_3(\text{H}_2\text{O})_4$  consists of one trimeric (a) and three tetrameric cooperative cycles (b to d)). The  $(\text{NH}_3)_4(\text{H}_2\text{O})_3$  and  $(\text{NH}_3)_5(\text{H}_2\text{O})_2$  clusters consist of three tetrameric cooperative cycles (a to c).

**Table S5** The N-H...O, O-H...N and O-H...O HB energies (in kcal/mol) in  $(\text{NH}_3)_3(\text{H}_2\text{O})_4$  and  $(\text{NH}_3)_4(\text{H}_2\text{O})_3$  clusters obtained by synergetic addition of cyclic cooperativity contributions ( $E_{\text{HB}}^{\text{Synergetic}}$ ) and that by MTA-based method employing actual cluster ( $E_{\text{HB}}^{\text{MTA}}$ ). The hydrogen bond energy in the respective dimer species ( $E_{\text{HB}}^{\text{Dimer}}$ ) are also provided (kcal/mol). All the calculations were performed at MP2/aug-cc-pVTZ level of theory. See Fig S3 and text for details.

| HB                                                        | $E_{\text{HB}}^{\text{Dimer}}$ | $E_{\text{coop.}}^{\text{Cycle1}}$ | $E_{\text{coop.}}^{\text{Cycle2}}$ | $E_{\text{HB}}^{\text{Synergetic}}$ | $E_{\text{HB}}^{(\text{NH}_3)_m(\text{H}_2\text{O})_n}$ | $ \Delta E_{\text{HB}} $ |
|-----------------------------------------------------------|--------------------------------|------------------------------------|------------------------------------|-------------------------------------|---------------------------------------------------------|--------------------------|
| <b><math>(\text{NH}_3)_3(\text{H}_2\text{O})_4</math></b> |                                |                                    |                                    |                                     |                                                         |                          |
| HB1                                                       | 4.34                           | -0.65 (-a)                         | 3.40 (+b)                          | 7.09                                | 7.36                                                    | 0.27                     |
| HB3                                                       | 2.36                           | -0.65 (-a)                         | 1.78 (+c)                          | 3.49                                | 3.18                                                    | 0.31                     |
| HB8                                                       | 2.58                           | -0.50 (-d)                         | 2.01 (+b)                          | 4.09                                | 4.01                                                    | 0.08                     |
| HB9                                                       | 6.82                           | 2.21 (+c)                          | 2.93 (+b)                          | 11.96                               | 12.04                                                   | 0.08                     |
| HB10                                                      | 1.91                           | 1.93 (+c)                          | 0.19 (-d)                          | 4.03                                | 3.85                                                    | 0.18                     |
| <b><math>(\text{NH}_3)_4(\text{H}_2\text{O})_3</math></b> |                                |                                    |                                    |                                     |                                                         |                          |
| HB7                                                       | 2.57                           | 1.89 (+a)                          | -0.53 (-b)                         | 3.93                                | 3.80                                                    | 0.13                     |
| HB8                                                       | 6.90                           | 2.11 (+a)                          | 2.50 (+c)                          | 11.51                               | 11.53                                                   | 0.02                     |
| HB9                                                       | 2.04                           | 2.29 (+c)                          | 0.19 (-b)                          | 4.52                                | 4.25                                                    | 0.27                     |
| <b><math>(\text{NH}_3)_5(\text{H}_2\text{O})_2</math></b> |                                |                                    |                                    |                                     |                                                         |                          |
| HB7                                                       | 6.92                           | 1.78 (+a)                          | 2.43 (+b)                          | 11.13                               | 10.89                                                   | 0.24                     |
| HB8                                                       | 2.75                           | 2.06 (+b)                          | -0.01 (-c)                         | 4.80                                | 4.50                                                    | 0.30                     |
| HB9                                                       | 3.13                           | 1.44 (+a)                          | -0.59 (-c)                         | 3.98                                | 3.89                                                    | 0.09                     |



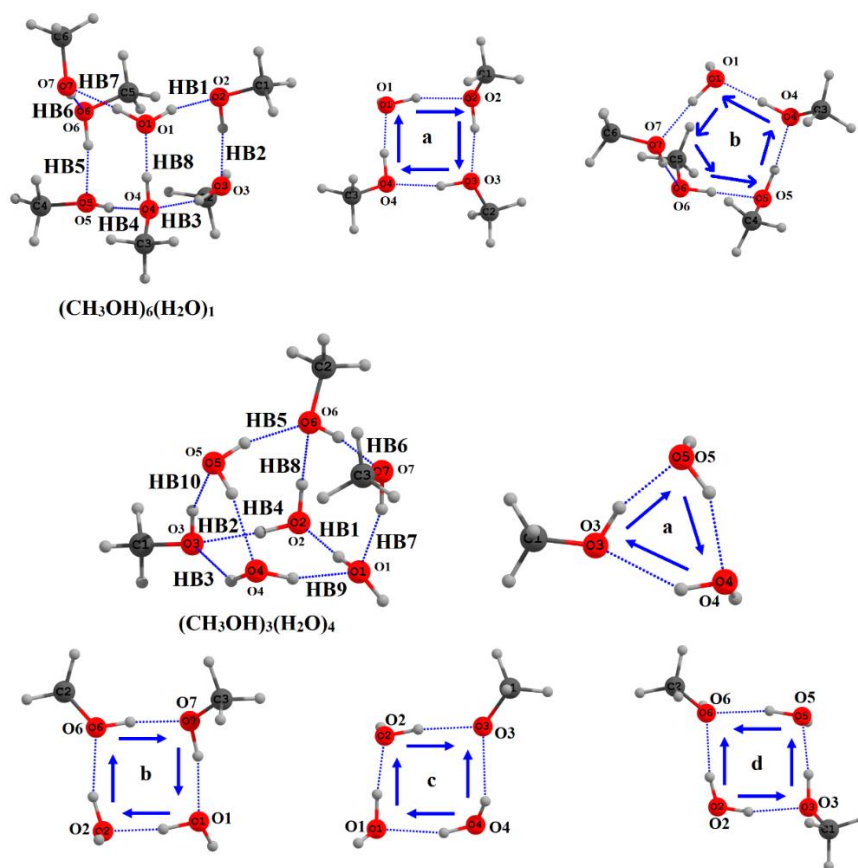

**Fig. S4** The MP2 optimized geometries of  $(\text{CH}_3\text{OH})_6(\text{H}_2\text{O})_1$  and  $(\text{CH}_3\text{OH})_3(\text{H}_2\text{O})_4$  clusters. See main text for details.

**Table S6** The hydrogen bond energies (in kcal/mol) in  $(\text{CH}_3\text{OH})_6(\text{H}_2\text{O})_1$  and  $(\text{CH}_3\text{OH})_3(\text{H}_2\text{O})_4$  clusters obtained by synergetic addition of cyclic cooperativity contributions ( $E_{\text{HB}}^{\text{Synergetic}}$ ) and that by MTA-based method employing actual cluster ( $E_{\text{HB}}^{\text{MTA}}$ ). The hydrogen bond energy in the respective dimer species ( $E_{\text{HB}}^{\text{Dimer}}$ ) is also provided (kcal/mol). All the calculations were performed at MP2/aug-cc-pVTZ level of theory. See Fig. S4 and text for details.

| HB                                               | $E_{\text{HB}}^{\text{Dimer}}$ | $E_{\text{coop.}}^{\text{Cycle1}}$ | $E_{\text{coop.}}^{\text{Cycle2}}$ | $E_{\text{HB}}^{\text{Synergetic}}$ | $E_{\text{HB}}^{(\text{CH}_3\text{OH})_m(\text{H}_2\text{O})_n}$ | $ \Delta E_{\text{HB}} $ |
|--------------------------------------------------|--------------------------------|------------------------------------|------------------------------------|-------------------------------------|------------------------------------------------------------------|--------------------------|
| $(\text{CH}_3\text{OH})_6(\text{H}_2\text{O})_1$ |                                |                                    |                                    |                                     |                                                                  |                          |
| HB8                                              | 3.80                           | 4.41 (+a)                          | 4.31 (+b)                          | 12.52                               | 12.40                                                            | 0.12                     |
| $(\text{CH}_3\text{OH})_3(\text{H}_2\text{O})_4$ |                                |                                    |                                    |                                     |                                                                  |                          |
| HB1                                              | 4.50                           | 3.81 (+b)                          | 2.30 (+c) partial                  | 10.61                               | 10.90                                                            | 0.29                     |
| HB2                                              | 4.30                           | -0.07 (-d)                         | 0.87 (-c)                          | 5.10                                | 5.10                                                             | 0.00                     |
| HB3                                              | 4.80                           | 2.20 (+a)                          | -0.61 (-c)                         | 6.38                                | 6.60                                                             | 0.22                     |
| HB8                                              | 5.60                           | 3.49 (+b)                          | -1.50 (-d)                         | 7.60                                | 7.70                                                             | 0.10                     |
| HB10                                             | 4.40                           | 2.31 (+a)                          | 1.94 (+d) partial                  | 8.65                                | 9.10                                                             | 0.45                     |

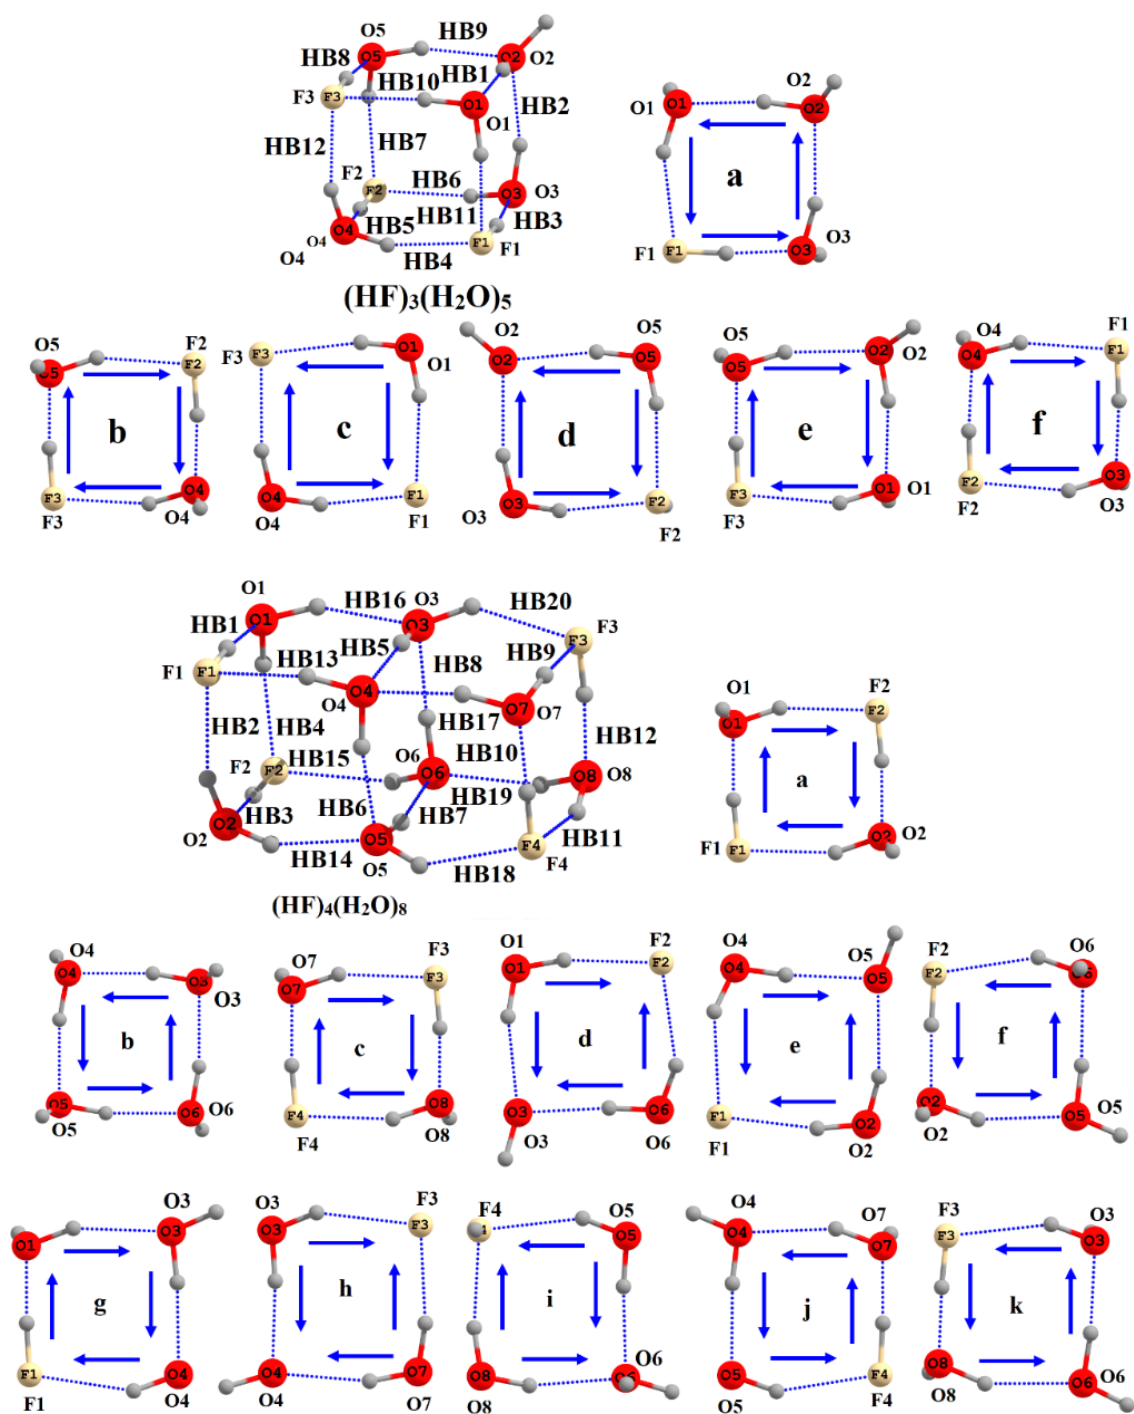

**Fig. S5** Structure of  $(\text{HF})_3(\text{H}_2\text{O})_5$  cluster consisting of six tetrameric cooperative cycles (a to f) and that of  $(\text{HF})_4(\text{H}_2\text{O})_8$  cluster with eleven tetrameric cooperative cycles (a to k).

**Table S7** Cartesian coordinates of various molecular clusters optimized at MP2/aug-cc-pVDZ level of theory.

**(NH<sub>3</sub>)<sub>8</sub>**

**E(MP2(full)/ aug-cc-pVTZ) = -451.8966258 a.u.**

|   |              |              |              |
|---|--------------|--------------|--------------|
| N | -2.109504000 | 1.726363000  | 1.261954000  |
| H | -3.067935000 | 1.462392000  | 1.466698000  |
| H | -2.040322000 | 2.717953000  | 1.467270000  |
| H | -1.966549000 | 1.609821000  | 0.253791000  |
| N | 1.125441000  | 1.375173000  | 1.703012000  |
| H | 1.494154000  | 1.825752000  | 2.533881000  |
| H | 1.376005000  | 0.390004000  | 1.761470000  |
| H | 0.110179000  | 1.426298000  | 1.761222000  |
| N | 2.108586000  | -1.726831000 | 1.262704000  |
| H | 2.039121000  | -2.718481000 | 1.467634000  |
| H | 3.066912000  | -1.463068000 | 1.468204000  |
| H | 1.966354000  | -1.609927000 | 0.254480000  |
| N | -1.126643000 | -1.375777000 | 1.701985000  |
| H | -1.377238000 | -0.390629000 | 1.760664000  |
| H | -1.495891000 | -1.826680000 | 2.532440000  |
| H | -0.111418000 | -1.426924000 | 1.760821000  |
| N | -1.726176000 | -2.108774000 | -1.263200000 |
| H | -2.717715000 | -2.039302000 | -1.468666000 |
| H | -1.462345000 | -3.067145000 | -1.468405000 |
| H | -1.609804000 | -1.966380000 | -0.254937000 |
| N | 1.376054000  | -1.125773000 | -1.702266000 |
| H | 1.427226000  | -0.110523000 | -1.760647000 |
| H | 1.827031000  | -1.494655000 | -2.532845000 |
| H | 0.390907000  | -1.376324000 | -1.761153000 |
| N | 1.727100000  | 2.109242000  | -1.261454000 |
| H | 2.718791000  | 2.039848000  | -1.466211000 |
| H | 1.609979000  | 1.966501000  | -0.253327000 |
| H | 1.463409000  | 3.067680000  | -1.466528000 |
| N | -1.374845000 | 1.126394000  | -1.702733000 |
| H | -0.389667000 | 1.376983000  | -1.760941000 |
| H | -1.825319000 | 1.495521000  | -2.533475000 |
| H | -1.425962000 | 0.111162000  | -1.761451000 |

**(NH<sub>3</sub>)<sub>20</sub>**

**E(MP2/ aug-cc-pVTZ) = -1129.398431 a.u.**

|   |             |              |              |
|---|-------------|--------------|--------------|
| N | 5.681444000 | 2.036575000  | -1.789984000 |
| H | 5.907471000 | 2.998609000  | -1.554437000 |
| H | 5.905455000 | 1.926368000  | -2.774748000 |
| H | 4.659308000 | 1.926225000  | -1.691446000 |
| N | 6.043009000 | 1.153394000  | 1.313277000  |
| H | 6.101095000 | 0.137711000  | 1.401841000  |
| H | 6.872650000 | 1.540293000  | 1.751668000  |
| H | 6.099092000 | 1.371269000  | 0.317200000  |
| N | 5.681386000 | -2.036656000 | 1.789979000  |
| H | 5.907396000 | -2.998701000 | 1.554465000  |

|   |              |              |              |
|---|--------------|--------------|--------------|
| H | 4.659260000  | -1.926267000 | 1.691387000  |
| H | 5.905358000  | -1.926423000 | 2.774748000  |
| N | 6.042973000  | -1.153450000 | -1.313281000 |
| H | 6.099026000  | -1.371308000 | -0.317198000 |
| H | 6.872614000  | -1.540378000 | -1.751645000 |
| H | 6.101076000  | -0.137770000 | -1.401861000 |
| N | 2.832394000  | 1.326972000  | -1.163257000 |
| H | 2.874711000  | 1.403518000  | -0.148037000 |
| H | 1.893969000  | 1.628580000  | -1.424760000 |
| H | 2.871600000  | 0.330622000  | -1.373218000 |
| N | 3.243353000  | 1.889871000  | 2.159942000  |
| H | 3.115439000  | 2.894639000  | 2.075921000  |
| H | 3.116779000  | 1.669069000  | 3.143924000  |
| H | 4.232173000  | 1.692595000  | 1.932342000  |
| N | 2.832378000  | -1.326908000 | 1.163197000  |
| H | 1.893928000  | -1.628431000 | 1.424722000  |
| H | 2.874666000  | -1.403450000 | 0.147976000  |
| H | 2.871676000  | -0.330560000 | 1.373144000  |
| N | 3.243309000  | -1.889997000 | -2.159859000 |
| H | 3.116786000  | -1.669571000 | -3.143932000 |
| H | 3.115348000  | -2.894726000 | -2.075454000 |
| H | 4.232130000  | -1.692677000 | -1.932300000 |
| N | -0.272480000 | 2.198121000  | -1.890660000 |
| H | -0.127847000 | 3.173993000  | -1.645901000 |
| H | -0.122904000 | 2.134042000  | -2.894016000 |
| H | -1.271847000 | 1.992514000  | -1.725290000 |
| N | 0.147102000  | 1.146749000  | 1.302395000  |
| H | 0.101739000  | 0.132694000  | 1.392741000  |
| H | 1.084536000  | 1.410094000  | 1.606917000  |
| H | 0.114638000  | 1.348582000  | 0.303912000  |
| N | -0.272294000 | -2.197944000 | 1.890728000  |
| H | -0.127616000 | -3.173856000 | 1.646155000  |
| H | -1.271655000 | -1.992392000 | 1.725250000  |
| H | -0.122804000 | -2.133687000 | 2.894086000  |
| N | 0.147042000  | -1.146532000 | -1.302490000 |
| H | 0.114692000  | -1.348449000 | -0.304021000 |
| H | 1.084481000  | -1.409718000 | -1.607127000 |
| H | 0.101520000  | -0.132477000 | -1.392762000 |
| N | -3.049451000 | 1.280937000  | -1.195478000 |
| H | -3.066928000 | 1.349219000  | -0.179371000 |
| H | -3.984813000 | 1.537923000  | -1.505734000 |
| H | -2.944701000 | 0.291817000  | -1.418808000 |
| N | -2.607932000 | 1.930546000  | 2.140332000  |
| H | -2.780914000 | 2.909939000  | 1.929968000  |
| H | -2.715644000 | 1.833108000  | 3.146469000  |
| H | -1.610229000 | 1.750679000  | 1.931583000  |
| N | -3.049269000 | -1.280926000 | 1.195358000  |
| H | -3.984596000 | -1.537973000 | 1.505666000  |
| H | -3.066785000 | -1.349244000 | 0.179254000  |
| H | -2.944572000 | -0.291797000 | 1.418667000  |

|   |              |              |              |
|---|--------------|--------------|--------------|
| N | -2.607922000 | -1.930458000 | -2.140515000 |
| H | -2.715632000 | -1.832824000 | -3.146633000 |
| H | -2.780857000 | -2.909902000 | -1.930348000 |
| H | -1.610232000 | -1.750577000 | -1.931721000 |
| N | -6.312978000 | 1.987946000  | -1.140011000 |
| H | -6.198002000 | 1.770951000  | -0.137399000 |
| H | -6.048047000 | 2.958585000  | -1.279163000 |
| H | -7.304156000 | 1.929242000  | -1.354116000 |
| N | -5.712653000 | 1.081060000  | 1.681273000  |
| H | -6.180412000 | 1.405026000  | 2.521813000  |
| H | -4.716808000 | 1.274080000  | 1.794056000  |
| H | -5.820933000 | 0.064454000  | 1.644998000  |
| N | -6.312890000 | -1.988071000 | 1.140186000  |
| H | -6.197975000 | -1.771089000 | 0.137565000  |
| H | -7.304061000 | -1.929444000 | 1.354337000  |
| H | -6.047867000 | -2.958685000 | 1.279349000  |
| N | -5.712718000 | -1.081227000 | -1.681152000 |
| H | -5.820967000 | -0.064619000 | -1.644860000 |
| H | -4.716888000 | -1.274273000 | -1.794029000 |
| H | -6.180565000 | -1.405174000 | -2.521651000 |

**(H<sub>2</sub>S)<sub>8</sub>**

**MP2(full)/aug-cc-pVTZ= -3191.6419771 a.u.**

|   |              |              |              |
|---|--------------|--------------|--------------|
| S | 2.394462000  | -2.150190000 | 2.137413000  |
| H | 2.480478000  | -0.798877000 | 2.120198000  |
| H | 1.053066000  | -2.105273000 | 2.317209000  |
| S | 1.560585000  | 1.733776000  | 1.723687000  |
| H | 1.906148000  | 1.984707000  | 0.433848000  |
| H | 2.378156000  | 2.693279000  | 2.206753000  |
| S | 2.446809000  | 2.134988000  | -2.096767000 |
| H | 2.529793000  | 0.783478000  | -2.079316000 |
| H | 1.108224000  | 2.092944000  | -2.297683000 |
| S | 1.579641000  | -1.742721000 | -1.699379000 |
| H | 2.395898000  | -2.711075000 | -2.166770000 |
| H | 1.900037000  | -1.995487000 | -0.403435000 |
| S | -1.592469000 | -1.704312000 | 1.729002000  |
| H | -2.421633000 | -2.175934000 | 2.684235000  |
| H | -1.923203000 | -0.409940000 | 1.976482000  |
| S | -2.432597000 | 2.128328000  | 2.119097000  |
| H | -1.091270000 | 2.312397000  | 2.090998000  |
| H | -2.501068000 | 2.107232000  | 0.766816000  |
| S | -1.548608000 | 1.714122000  | -1.753690000 |
| H | -2.358469000 | 2.189592000  | -2.723464000 |
| H | -1.882507000 | 0.421466000  | -2.005846000 |
| S | -2.408023000 | -2.113303000 | -2.159643000 |
| H | -2.501780000 | -2.093013000 | -0.808890000 |
| H | -1.068663000 | -2.306495000 | -2.106648000 |

**(H<sub>2</sub>O)<sub>4</sub>(H<sub>2</sub>S)<sub>2</sub>-A****MP2(full)/aug-cc-pVTZ = -1103.3292035 a.u.**

|   |              |              |              |
|---|--------------|--------------|--------------|
| O | 2.802707000  | -0.906395000 | -0.929588000 |
| H | 2.186157000  | -1.283345000 | -0.273320000 |
| H | 2.688979000  | -1.459735000 | -1.713089000 |
| O | 2.058191000  | 1.797873000  | -1.056680000 |
| H | 2.375493000  | 0.870844000  | -1.062023000 |
| H | 2.840832000  | 2.318745000  | -0.836572000 |
| S | -0.615293000 | 2.183187000  | 0.908903000  |
| H | -0.326796000 | 1.092970000  | 1.653987000  |
| H | 0.479541000  | 2.018952000  | 0.110271000  |
| O | -2.735324000 | 0.524403000  | -1.069952000 |
| H | -2.129891000 | 1.065515000  | -0.524997000 |
| H | -3.617735000 | 0.782581000  | -0.774058000 |
| O | -1.901255000 | -2.119704000 | -0.922570000 |
| H | -2.256758000 | -1.208867000 | -1.012381000 |
| H | -1.788419000 | -2.424583000 | -1.831437000 |
| S | 0.468481000  | -1.638514000 | 1.336050000  |
| H | -0.486595000 | -1.945026000 | 0.409350000  |
| H | 0.589629000  | -2.912228000 | 1.765351000  |

**(H<sub>2</sub>O)<sub>4</sub>(H<sub>2</sub>S)<sub>2</sub>-B****MP2(full)/aug-cc-pVTZ = -1103.320266 a.u.**

|   |              |              |              |
|---|--------------|--------------|--------------|
| S | 0.231254000  | -1.688134000 | 1.238505000  |
| H | -0.670965000 | -1.894226000 | 0.245701000  |
| H | 1.276241000  | -1.586889000 | 0.387167000  |
| S | -0.448717000 | 1.992240000  | 0.417414000  |
| H | -0.201473000 | 0.720858000  | 0.840704000  |
| H | -0.520527000 | 2.473591000  | 1.674850000  |
| O | 3.159584000  | -1.172311000 | -0.774598000 |
| H | 3.239149000  | -1.408405000 | -1.708373000 |
| H | 3.996358000  | -1.458480000 | -0.384594000 |
| O | 2.954900000  | 1.787205000  | -0.589747000 |
| H | 2.064561000  | 2.013807000  | -0.285484000 |
| H | 2.955230000  | 0.817062000  | -0.605610000 |
| O | -2.284753000 | -1.804086000 | -1.010816000 |
| H | -2.739929000 | -0.942281000 | -0.928114000 |
| H | -2.541599000 | -2.138718000 | -1.877841000 |
| O | -3.405791000 | 0.746212000  | -0.588203000 |
| H | -2.667492000 | 1.266810000  | -0.223850000 |
| H | -4.101662000 | 0.815015000  | 0.077657000  |

**(H<sub>2</sub>O)<sub>4</sub>(H<sub>2</sub>S)<sub>2</sub>-C****MP2(full)/aug-cc-pVTZ = -1103.325805 a.u.**

|   |              |              |             |
|---|--------------|--------------|-------------|
| S | -0.055955000 | 1.809484000  | 1.173572000 |
| H | 0.900220000  | 1.853175000  | 0.210713000 |
| H | -1.082725000 | 1.764758000  | 0.286048000 |
| S | 0.100115000  | -1.875724000 | 0.574315000 |
| H | 0.043475000  | -0.546403000 | 0.902358000 |

|   |              |              |              |
|---|--------------|--------------|--------------|
| H | 0.036373000  | -2.276757000 | 1.860086000  |
| O | -2.725396000 | 1.369156000  | -0.927948000 |
| H | -3.557318000 | 1.829070000  | -0.762924000 |
| H | -2.942293000 | 0.421743000  | -0.826555000 |
| O | -3.058735000 | -1.426712000 | -0.575097000 |
| H | -2.202154000 | -1.711323000 | -0.211223000 |
| H | -3.173075000 | -1.968297000 | -1.366418000 |
| O | 2.531770000  | 1.534302000  | -1.023021000 |
| H | 2.814464000  | 0.601646000  | -0.954985000 |
| H | 2.572015000  | 1.735656000  | -1.965512000 |
| O | 3.192663000  | -1.192735000 | -0.598917000 |
| H | 2.423199000  | -1.558260000 | -0.129384000 |
| H | 3.938841000  | -1.357258000 | -0.008520000 |

**(H<sub>2</sub>O)<sub>4</sub>(H<sub>2</sub>S)<sub>2</sub>-D1**

**MP2(full)/aug-cc-pVTZ = -1103.3145399 a.u.**

|   |              |              |              |
|---|--------------|--------------|--------------|
| O | -3.088847000 | -1.189663000 | -1.021912000 |
| H | -3.981569000 | -1.538022000 | -0.896757000 |
| H | -2.759881000 | -1.645777000 | -1.808848000 |
| O | -2.396415000 | 1.916236000  | -0.575404000 |
| H | -2.662868000 | 1.004271000  | -0.781281000 |
| H | -2.779765000 | 2.442387000  | -1.288749000 |
| S | 0.819019000  | 2.256109000  | 0.716127000  |
| H | 0.567082000  | 1.245430000  | 1.576533000  |
| H | -0.405285000 | 2.150451000  | 0.139432000  |
| O | 2.809158000  | 0.377464000  | -1.371511000 |
| H | 2.255892000  | 0.958645000  | -0.818692000 |
| H | 3.713791000  | 0.641734000  | -1.159239000 |
| O | 2.245423000  | -2.317264000 | -0.665150000 |
| H | 2.455069000  | -1.408583000 | -0.945887000 |
| H | 1.456067000  | -2.206795000 | -0.118273000 |
| S | -0.332973000 | -1.499275000 | 1.327224000  |
| H | -0.754170000 | -2.629400000 | 1.933247000  |
| H | -1.435648000 | -1.417876000 | 0.546723000  |

**(H<sub>2</sub>O)<sub>4</sub>(H<sub>2</sub>S)<sub>2</sub>-D2**

**MP2(full)/aug-cc-pVTZ = -1103.3397101 a.u.**

|   |              |              |              |
|---|--------------|--------------|--------------|
| S | -1.636341000 | 1.915087000  | -0.030915000 |
| H | -1.656124000 | 0.847885000  | -0.866363000 |
| H | -2.179232000 | 2.746876000  | -0.944463000 |
| S | 2.341590000  | 1.365952000  | -0.012187000 |
| H | 1.075553000  | 1.830825000  | -0.136261000 |
| H | 2.110711000  | 0.349325000  | -0.875711000 |
| O | -1.725535000 | -1.251704000 | 1.451115000  |
| H | -2.246418000 | -0.481897000 | 1.715704000  |
| H | -1.823595000 | -1.291507000 | 0.477874000  |
| O | 1.060732000  | -1.452746000 | 1.480513000  |
| H | 0.101296000  | -1.325744000 | 1.644637000  |
| H | 1.436791000  | -0.557449000 | 1.505482000  |
| O | -1.510113000 | -1.258634000 | -1.357223000 |

|   |              |              |              |
|---|--------------|--------------|--------------|
| H | -0.575655000 | -1.566198000 | -1.438111000 |
| H | -2.014828000 | -1.802102000 | -1.974738000 |
| O | 1.142212000  | -1.874690000 | -1.176248000 |
| H | 1.566555000  | -2.706832000 | -1.419817000 |
| H | 1.182611000  | -1.837622000 | -0.183858000 |

**(H<sub>2</sub>O)<sub>4</sub>(H<sub>2</sub>S)<sub>2</sub>-E**

**MP2(full)/aug-cc-pVTZ = -1103.3338019 a.u.**

|   |              |              |              |
|---|--------------|--------------|--------------|
| S | 3.115082000  | -0.684154000 | -0.626977000 |
| H | 2.041649000  | -1.113632000 | 0.088127000  |
| H | 2.435679000  | -0.709433000 | -1.793815000 |
| O | 1.903173000  | 2.416905000  | -0.030814000 |
| H | 2.428571000  | 1.615877000  | -0.210828000 |
| H | 2.506047000  | 3.001890000  | 0.445803000  |
| O | -0.417493000 | 1.260610000  | 1.193003000  |
| H | -0.087362000 | 0.352307000  | 1.320050000  |
| H | 0.344431000  | 1.742451000  | 0.818033000  |
| S | -3.050554000 | 0.812026000  | -0.649541000 |
| H | -1.951498000 | 1.115308000  | 0.117017000  |
| H | -3.886362000 | 0.820399000  | 0.410899000  |
| O | -1.902122000 | -2.247293000 | -0.169243000 |
| H | -2.352918000 | -1.402023000 | -0.374911000 |
| H | -1.905926000 | -2.735492000 | -1.002434000 |
| O | 0.348906000  | -1.532017000 | 1.234179000  |
| H | -0.425945000 | -1.877883000 | 0.734893000  |
| H | 0.361480000  | -2.041357000 | 2.054440000  |

**(H<sub>2</sub>O)<sub>4</sub>(H<sub>2</sub>S)<sub>2</sub>-F1**

**MP2(full)/aug-cc-pVTZ = -1103.3162089 a.u.**

|   |              |              |              |
|---|--------------|--------------|--------------|
| O | -0.141119000 | 1.391412000  | 1.470296000  |
| H | 0.593703000  | 1.727235000  | 0.911541000  |
| H | -0.938101000 | 1.586691000  | 0.957244000  |
| O | 0.339425000  | -1.295613000 | 1.487424000  |
| H | 0.133738000  | -0.336109000 | 1.601398000  |
| H | 0.427603000  | -1.645294000 | 2.383069000  |
| S | -2.838704000 | 0.639743000  | -0.594836000 |
| H | -2.528857000 | 0.550329000  | -1.904879000 |
| H | -4.052345000 | 1.182577000  | -0.826982000 |
| O | -1.974613000 | -2.098108000 | -0.201486000 |
| H | -1.199763000 | -2.029396000 | 0.382599000  |
| H | -2.336937000 | -1.203706000 | -0.204421000 |
| O | 2.022006000  | 2.024011000  | -0.124570000 |
| H | 2.286700000  | 1.223942000  | -0.619532000 |
| H | 2.132521000  | 2.769371000  | -0.728160000 |
| S | 2.712013000  | -0.779030000 | -0.852261000 |
| H | 1.813325000  | -1.102357000 | 0.119878000  |
| H | 3.729886000  | -0.668297000 | 0.028495000  |

**(H<sub>2</sub>O)<sub>4</sub>(H<sub>2</sub>S)<sub>2</sub>-F2**

**MP2(full)/aug-cc-pVTZ = -1103.3358741 a.u.**



|   |              |              |              |
|---|--------------|--------------|--------------|
| O | 1.781832000  | -1.325290000 | 1.432385000  |
| H | 1.553946000  | -1.698455000 | 0.550331000  |
| H | 2.217581000  | -2.040312000 | 1.912259000  |
| O | -0.786149000 | -0.324105000 | 2.023864000  |
| H | 0.139257000  | -0.636655000 | 1.961010000  |
| H | -0.739314000 | 0.639417000  | 1.916698000  |
| S | 1.865206000  | 1.399783000  | -0.828248000 |
| H | 2.177466000  | 0.708763000  | 0.293460000  |
| H | 0.671285000  | 1.796385000  | -0.324114000 |
| O | -1.285793000 | 2.211323000  | 0.606610000  |
| H | -1.689360000 | 3.082027000  | 0.717327000  |
| H | -1.932602000 | 1.698134000  | 0.093342000  |
| O | 1.031713000  | -1.878972000 | -1.166027000 |
| H | 0.067005000  | -1.942499000 | -1.257704000 |
| H | 1.221268000  | -0.965317000 | -1.446151000 |
| S | -2.158379000 | -0.656046000 | -0.886526000 |
| H | -1.643134000 | -0.691405000 | 0.388151000  |
| H | -3.285448000 | -1.313537000 | -0.542887000 |

**(H<sub>2</sub>O)<sub>4</sub>(H<sub>2</sub>S)<sub>2</sub>-G**

**MP2(full)/aug-cc-pVTZ = -1103.3366492 a.u.**

|   |              |              |              |
|---|--------------|--------------|--------------|
| O | 0.517683000  | -1.459843000 | 1.466682000  |
| H | -0.107010000 | -1.954790000 | 0.897996000  |
| H | 1.274557000  | -1.281090000 | 0.880130000  |
| O | -0.598481000 | 0.935634000  | 1.936028000  |
| H | -0.181909000 | 0.035581000  | 1.867713000  |
| H | -0.652831000 | 1.127703000  | 2.880112000  |
| S | 2.743608000  | -0.324029000 | -0.843380000 |
| H | 3.761011000  | 0.056441000  | -0.041863000 |
| H | 2.045508000  | 0.825503000  | -0.626154000 |
| O | 0.852709000  | 2.327773000  | -0.018179000 |
| H | 0.335849000  | 1.969078000  | 0.732108000  |
| H | 0.209978000  | 2.820604000  | -0.544427000 |
| O | -1.446763000 | -2.522089000 | -0.254304000 |
| H | -1.776183000 | -1.695092000 | -0.651393000 |
| H | -1.265931000 | -3.101899000 | -1.005391000 |
| S | -2.292267000 | 0.668672000  | -0.976273000 |
| H | -1.871752000 | 0.826976000  | 0.306054000  |
| H | -3.593927000 | 0.604893000  | -0.622268000 |

**(H<sub>2</sub>O)<sub>4</sub>(H<sub>2</sub>S)<sub>2</sub>-H1**

**MP2(full)/aug-cc-pVTZ = -1103.3103171 a.u.**

|   |              |              |              |
|---|--------------|--------------|--------------|
| O | -0.104475000 | -1.552857000 | 1.367067000  |
| H | -0.931237000 | -1.461054000 | 0.851361000  |
| H | -0.349272000 | -2.085219000 | 2.135601000  |
| O | 0.046945000  | 1.400748000  | 1.694656000  |
| H | 0.068796000  | 0.429486000  | 1.707095000  |
| H | -0.625600000 | 1.604581000  | 1.027164000  |
| O | 1.952689000  | -1.979700000 | -0.572728000 |
| H | 1.315165000  | -1.956049000 | 0.166894000  |

|   |              |              |              |
|---|--------------|--------------|--------------|
| H | 2.459294000  | -2.790674000 | -0.435198000 |
| S | 2.933552000  | 0.943581000  | -0.552796000 |
| H | 2.629067000  | -0.371931000 | -0.613690000 |
| H | 1.984794000  | 1.200025000  | 0.377823000  |
| S | -2.687300000 | -0.863269000 | -0.583181000 |
| H | -2.563610000 | 0.430780000  | -0.572068000 |
| H | -1.902040000 | -0.999967000 | -1.673220000 |
| O | -2.075396000 | 2.069067000  | -0.442369000 |
| H | -2.898182000 | 2.506339000  | -0.114322000 |
| H | -1.685310000 | 2.710632000  | -1.054807000 |

**(H<sub>2</sub>O)<sub>4</sub>(H<sub>2</sub>S)<sub>2</sub>-H<sub>2</sub>**

**MP2(full)/aug-cc-pVTZ = -1103.3327729 a.u.**

|   |              |              |              |
|---|--------------|--------------|--------------|
| O | -1.381910000 | -1.149339000 | 1.627614000  |
| H | -1.907484000 | -0.508667000 | 1.105366000  |
| H | -1.976402000 | -1.453620000 | 2.325993000  |
| O | 1.054687000  | 0.444759000  | 2.201589000  |
| H | 0.249267000  | -0.096941000 | 2.145211000  |
| H | 0.835961000  | 1.231156000  | 1.674725000  |
| O | -0.483083000 | -2.164657000 | -0.887752000 |
| H | -0.737711000 | -2.090987000 | 0.051257000  |
| H | -0.387385000 | -3.112511000 | -1.045940000 |
| S | 2.543374000  | -0.384216000 | -0.782025000 |
| H | 1.403364000  | -1.086546000 | -1.004142000 |
| H | 2.275798000  | -0.297038000 | 0.548259000  |
| S | -2.404760000 | 0.783989000  | -0.803388000 |
| H | -1.249529000 | 1.472179000  | -0.610677000 |
| H | -1.762566000 | -0.252888000 | -1.392748000 |
| O | 0.656983000  | 2.249642000  | -0.130029000 |
| H | 0.974133000  | 3.127459000  | -0.380011000 |
| H | 1.291324000  | 1.628791000  | -0.542067000 |

**(NH<sub>3</sub>)<sub>3</sub>(H<sub>2</sub>O)<sub>4</sub>**

**MP2/aug-cc-pVTZ = -474.7813386 a.u.**

|   |              |              |              |
|---|--------------|--------------|--------------|
| O | 2.417835000  | -1.068158000 | 0.366655000  |
| H | 1.657415000  | -1.102563000 | 1.027973000  |
| H | 3.012217000  | -1.788809000 | 0.607747000  |
| O | 0.567587000  | -0.711722000 | -1.687254000 |
| H | 1.289395000  | -1.003041000 | -1.090504000 |
| H | 0.601448000  | 0.252497000  | -1.577253000 |
| N | 2.013556000  | 1.818500000  | -0.694532000 |
| H | 2.456651000  | 1.009327000  | -0.247927000 |
| H | 2.491773000  | 1.957187000  | -1.585445000 |
| H | 2.248809000  | 2.631178000  | -0.122874000 |
| O | -0.492572000 | 1.852769000  | 0.923203000  |
| H | -1.354965000 | 1.654888000  | 0.492478000  |
| H | 0.152708000  | 1.877006000  | 0.194577000  |
| N | -2.992363000 | 0.942941000  | -0.185283000 |
| H | -2.773791000 | -0.046344000 | -0.341783000 |
| H | -3.384191000 | 1.303283000  | -1.054942000 |

|   |              |              |              |
|---|--------------|--------------|--------------|
| H | -3.744678000 | 0.978040000  | 0.502274000  |
| O | -1.679380000 | -1.809762000 | -0.556422000 |
| H | -1.925080000 | -2.587653000 | -1.071689000 |
| H | -0.893504000 | -1.438729000 | -1.025460000 |
| N | 0.156594000  | -0.937319000 | 1.869596000  |
| H | -0.100204000 | 0.050692000  | 1.734731000  |
| H | 0.081390000  | -1.138662000 | 2.865600000  |
| H | -0.567666000 | -1.482164000 | 1.394566000  |

**(NH<sub>3</sub>)<sub>4</sub>(H<sub>2</sub>O)<sub>3</sub>**

**MP2/aug-cc-pVTZ = -454.9095725 a.u.**

|   |              |              |              |
|---|--------------|--------------|--------------|
| O | -2.195760000 | -1.628673000 | -0.176304000 |
| H | -2.612999000 | -2.411191000 | -0.556516000 |
| H | -1.474799000 | -1.379272000 | -0.815348000 |
| N | -0.099868000 | -0.621191000 | -1.709881000 |
| H | 0.781736000  | -1.046400000 | -1.405140000 |
| H | -0.062299000 | 0.349604000  | -1.392969000 |
| H | -0.088755000 | -0.596081000 | -2.729075000 |
| O | 2.289097000  | -1.449835000 | -0.022619000 |
| H | 1.596368000  | -1.404502000 | 0.703802000  |
| H | 2.849235000  | -2.201637000 | 0.204116000  |
| N | 2.386660000  | 1.563471000  | -0.591187000 |
| H | 2.583089000  | 0.570890000  | -0.423176000 |
| H | 2.573306000  | 1.739685000  | -1.578270000 |
| H | 3.088763000  | 2.092723000  | -0.073793000 |
| O | -0.008651000 | 1.856905000  | 1.054390000  |
| H | -0.840037000 | 1.828199000  | 0.535535000  |
| H | 0.717968000  | 1.880155000  | 0.397898000  |
| N | -2.620351000 | 1.431629000  | -0.165842000 |
| H | -2.722782000 | 0.412415000  | -0.128232000 |
| H | -2.984061000 | 1.730328000  | -1.070684000 |
| H | -3.256357000 | 1.816619000  | 0.532828000  |
| N | 0.243710000  | -1.060883000 | 1.764734000  |
| H | 0.132160000  | -0.038589000 | 1.706031000  |
| H | 0.300002000  | -1.299908000 | 2.753964000  |
| H | -0.629089000 | -1.461398000 | 1.410531000  |

**(NH<sub>3</sub>)<sub>5</sub>(H<sub>2</sub>O)<sub>2</sub>**

**MP2/aug-cc-pVTZ = -435.019067 a.u.**

|   |              |              |              |
|---|--------------|--------------|--------------|
| O | 1.462423000  | -1.997307000 | 0.267803000  |
| H | 0.854945000  | -1.579697000 | 0.946229000  |
| H | 1.637937000  | -2.886908000 | 0.596612000  |
| N | -0.310308000 | -0.565365000 | -1.847471000 |
| H | 0.368690000  | -1.136993000 | -1.335457000 |
| H | -0.168666000 | 0.396036000  | -1.530813000 |
| H | -0.034166000 | -0.589646000 | -2.828879000 |
| N | -2.740407000 | -1.262992000 | -0.037322000 |
| H | -2.652829000 | -2.207393000 | 0.340903000  |
| H | -2.049338000 | -1.191798000 | -0.797767000 |
| H | -3.662945000 | -1.229099000 | -0.472881000 |

|   |              |              |              |
|---|--------------|--------------|--------------|
| O | -2.061477000 | 1.916108000  | -0.539755000 |
| H | -2.316661000 | 1.003020000  | -0.151847000 |
| H | -2.634905000 | 2.605253000  | -0.052492000 |
| N | 0.826033000  | 2.104113000  | 0.910016000  |
| H | 0.014696000  | 2.250361000  | 0.301181000  |
| H | 1.590242000  | 1.748062000  | 0.324319000  |
| H | 1.113634000  | 3.023468000  | 1.243396000  |
| N | 3.079968000  | 0.458485000  | -0.689855000 |
| H | 2.705582000  | -0.440270000 | -0.368774000 |
| H | 3.169410000  | 0.390192000  | -1.703682000 |
| H | 4.031380000  | 0.522949000  | -0.327745000 |
| N | -0.248015000 | -0.594683000 | 1.914879000  |
| H | 0.103790000  | 0.367327000  | 1.792856000  |
| H | -0.332243000 | -0.755867000 | 2.918135000  |
| H | -1.197020000 | -0.616311000 | 1.530592000  |

**(CH<sub>3</sub>OH)<sub>6</sub>(H<sub>2</sub>O)<sub>1</sub>**

**MP2/aug-cc-pVTZ = -769.6056432 a.u.**

|   |              |              |              |
|---|--------------|--------------|--------------|
| O | -0.298636000 | -0.869381000 | -1.539193000 |
| H | -0.577721000 | -1.519584000 | -0.855680000 |
| H | -0.879074000 | -0.083238000 | -1.397410000 |
| O | -0.687686000 | -2.623146000 | 0.568126000  |
| H | 0.203076000  | -2.458130000 | 0.959022000  |
| C | -0.785929000 | -4.025605000 | 0.276995000  |
| H | -0.724943000 | -4.627976000 | 1.197759000  |
| H | 0.004460000  | -4.351625000 | -0.419596000 |
| H | -1.764662000 | -4.192644000 | -0.192235000 |
| O | 1.826407000  | -2.000591000 | 1.399548000  |
| H | 2.112059000  | -1.464396000 | 0.627562000  |
| C | 2.065598000  | -1.217611000 | 2.583128000  |
| H | 1.514289000  | -1.693000000 | 3.405408000  |
| H | 3.138363000  | -1.205161000 | 2.833187000  |
| H | 1.713147000  | -0.181276000 | 2.460091000  |
| O | 2.116209000  | -0.311853000 | -0.740844000 |
| H | 1.202656000  | -0.511226000 | -1.119007000 |
| C | 3.065706000  | -0.266251000 | -1.820618000 |
| H | 2.771945000  | 0.486660000  | -2.569198000 |
| H | 3.150680000  | -1.248895000 | -2.310318000 |
| H | 4.039735000  | 0.009641000  | -1.394625000 |
| O | 1.601318000  | 1.868638000  | 0.818616000  |
| H | 1.851487000  | 1.096378000  | 0.260658000  |
| C | 1.452911000  | 2.990444000  | -0.074582000 |
| H | 2.415366000  | 3.247618000  | -0.545358000 |
| H | 1.114685000  | 3.842359000  | 0.529824000  |
| H | 0.702325000  | 2.785263000  | -0.856151000 |
| O | -0.995457000 | 1.642391000  | 1.582434000  |
| H | -0.021039000 | 1.666261000  | 1.424881000  |
| C | -1.302926000 | 0.436934000  | 2.306063000  |
| H | -2.385848000 | 0.440108000  | 2.489898000  |
| H | -0.784049000 | 0.418570000  | 3.277980000  |

|   |              |              |              |
|---|--------------|--------------|--------------|
| H | -1.043944000 | -0.467112000 | 1.731827000  |
| O | -1.775326000 | 1.363708000  | -0.991538000 |
| H | -1.543187000 | 1.524509000  | -0.043341000 |
| C | -3.201552000 | 1.226485000  | -1.069574000 |
| H | -3.559000000 | 0.362513000  | -0.482833000 |
| H | -3.458333000 | 1.067886000  | -2.125552000 |
| H | -3.707594000 | 2.138196000  | -0.712924000 |

**(CH<sub>3</sub>OH)<sub>3</sub>(H<sub>2</sub>O)<sub>4</sub>**

**MP2/aug-cc-pVTZ = -652.0030525 a.u.**

|   |              |              |              |
|---|--------------|--------------|--------------|
| O | 0.780267000  | 1.791335000  | 1.658708000  |
| H | 0.191469000  | 1.011794000  | 1.871161000  |
| H | 0.849393000  | 2.306119000  | 2.472046000  |
| O | -0.728657000 | -0.382208000 | 1.890830000  |
| H | -1.517108000 | -0.236821000 | 1.323920000  |
| H | -0.190247000 | -1.016353000 | 1.375277000  |
| O | -2.681098000 | 0.130834000  | -0.046376000 |
| H | -2.124331000 | -0.260183000 | -0.765027000 |
| C | -4.010924000 | -0.403547000 | -0.140401000 |
| H | -4.604555000 | 0.058139000  | 0.659451000  |
| H | -4.014113000 | -1.497104000 | -0.002325000 |
| H | -4.467958000 | -0.159549000 | -1.112496000 |
| O | -0.659604000 | 2.137992000  | -0.814973000 |
| H | -1.548747000 | 1.886072000  | -0.512902000 |
| H | -0.162248000 | 2.229881000  | 0.018745000  |
| O | -0.757756000 | -0.544389000 | -1.821725000 |
| H | -0.481371000 | 0.385029000  | -1.694779000 |
| H | -0.117989000 | -1.049275000 | -1.279512000 |
| O | 1.009856000  | -1.684080000 | 0.072731000  |
| H | 1.698798000  | -0.969750000 | 0.101920000  |
| C | 1.673060000  | -2.959957000 | 0.053588000  |
| H | 2.283672000  | -3.075553000 | -0.856175000 |
| H | 0.893886000  | -3.733252000 | 0.061220000  |
| H | 2.313571000  | -3.085596000 | 0.940669000  |
| C | 2.797025000  | 1.111891000  | -1.065624000 |
| H | 2.153325000  | 0.991577000  | 0.794873000  |
| O | 2.665255000  | 0.413495000  | 0.189346000  |
| H | 3.471205000  | 1.976008000  | -0.960237000 |
| H | 1.819822000  | 1.454738000  | -1.440388000 |
| H | 3.234770000  | 0.405488000  | -1.783034000 |

**(HF)<sub>3</sub>(H<sub>2</sub>O)<sub>5</sub>**

**E(MP2/ aug-cc-pVTZ) = -682.7973725 a.u.**

|   |             |              |              |
|---|-------------|--------------|--------------|
| O | 1.841245000 | -0.002124000 | 1.510673000  |
| H | 1.267501000 | 0.763727000  | 1.686548000  |
| H | 1.266548000 | -0.767562000 | 1.685252000  |
| O | 2.147804000 | -0.000242000 | -1.140203000 |
| H | 2.196807000 | -0.001008000 | -0.145793000 |
| H | 3.058590000 | -0.000494000 | -1.460611000 |
| O | 0.122117000 | -1.919951000 | -1.185095000 |

|   |              |              |              |
|---|--------------|--------------|--------------|
| H | 0.905412000  | -1.352310000 | -1.344874000 |
| H | -0.628813000 | -1.398292000 | -1.523877000 |
| O | -2.074656000 | 0.000366000  | 0.985786000  |
| H | -1.557520000 | -0.770521000 | 1.288251000  |
| H | -1.556688000 | 0.770241000  | 1.289410000  |
| O | 0.124146000  | 1.921672000  | -1.182168000 |
| H | 0.906823000  | 1.353430000  | -1.342830000 |
| H | -0.627349000 | 1.401362000  | -1.521766000 |
| F | -0.175475000 | -2.032110000 | 1.258180000  |
| H | -0.048615000 | -2.053194000 | 0.271601000  |
| F | -1.919318000 | 0.002124000  | -1.468891000 |
| H | -2.052359000 | 0.001464000  | -0.480562000 |
| F | -0.173399000 | 2.030432000  | 1.261281000  |
| H | -0.046458000 | 2.052874000  | 0.274749000  |

**(HF)<sub>4</sub>(H<sub>2</sub>O)<sub>8</sub>**

**E(MP2/ aug-cc-pVTZ) = -1012.201323 a.u.**

|   |              |              |              |
|---|--------------|--------------|--------------|
| O | 2.794865000  | 1.773670000  | -0.429186000 |
| H | 2.949750000  | 1.437444000  | 0.473393000  |
| H | 1.880975000  | 2.119535000  | -0.405634000 |
| F | 2.848815000  | -0.200709000 | -1.913872000 |
| H | 2.859279000  | 0.623045000  | -1.361616000 |
| O | 2.794903000  | -1.773668000 | 0.429160000  |
| H | 1.881015000  | -2.119534000 | 0.405624000  |
| H | 2.949780000  | -1.437433000 | -0.473418000 |
| F | 2.848835000  | 0.200712000  | 1.913844000  |
| H | 2.859310000  | -0.623043000 | 1.361586000  |
| O | 0.004651000  | 1.907473000  | -0.364706000 |
| H | -0.868773000 | 2.332746000  | -0.394329000 |
| H | -0.062910000 | 1.161949000  | -1.007199000 |
| O | -0.004682000 | -0.364683000 | -1.907465000 |
| H | 0.868744000  | -0.394324000 | -2.332731000 |
| H | 0.062872000  | -1.007143000 | -1.161909000 |
| O | 0.004665000  | -1.907467000 | 0.364697000  |
| H | -0.062893000 | -1.161938000 | 1.007186000  |
| H | -0.868758000 | -2.332741000 | 0.394328000  |
| O | -0.004647000 | 0.364687000  | 1.907432000  |
| H | 0.868775000  | 0.394262000  | 2.332709000  |
| H | 0.062890000  | 1.007196000  | 1.161924000  |
| F | -2.848851000 | 1.913862000  | -0.200712000 |
| H | -2.859281000 | 1.361615000  | 0.623056000  |
| O | -2.794900000 | -0.429190000 | -1.773623000 |
| H | -2.949786000 | 0.473389000  | -1.437398000 |
| H | -1.881021000 | -0.405649000 | -2.119511000 |
| F | -2.848835000 | -1.913849000 | 0.200755000  |
| H | -2.859308000 | -1.361642000 | -0.623036000 |
| O | -2.794848000 | 0.429199000  | 1.773681000  |
| H | -2.949737000 | -0.473383000 | 1.437459000  |
| H | -1.880954000 | 0.405651000  | 2.119531000  |
